# Supplementary material for: Phase selectivity triggered by nanoconfinement: the impact of corral dimensions
Source: Royal Society of Chemistry journal article supplement (doi:10.1039/c8cc08602h), 2019-01-01
Supplement: c8cc08602h1.pdf [file c8cc08602h1.pdf]

## Supporting Information

### Phase selectivity triggered by nanoconfinement: the impact of corral dimensions

Yi Hu,<sup>a,b</sup> Ana M. Bragança,<sup>a</sup> Lander Verstraete,<sup>a</sup> Oleksandr Ivasenko,<sup>a</sup> Brandon E. Hirsch,<sup>a</sup> Kazukuni Tahara,<sup>c,d</sup> Yoshito Tobe,<sup>c</sup> and Steven De Feyter<sup>\*a</sup>

<sup>a</sup> Department of Chemistry, Division of Molecular Imaging and Photonics, KU Leuven, Celestijnenlaan 200F, B-3001 Leuven, Belgium.

<sup>b</sup> College of Materials Science and Engineering, South China University of Technology, Guangzhou 510640, China.

<sup>c</sup> Department of Applied Chemistry, School of Science and Technology, Meiji University, 1-1-1 Higashimita, Tama-ku, Kawasaki, 214-8571, Japan.

<sup>d</sup> Division of Frontier Materials Science, Graduate School of Engineering Science, Osaka University, Toyonaka, Osaka 560-8531, Japan.

#### Corresponding author:

steven.defeyter@kuleuven.be

|      |                                                                             |     |
|------|-----------------------------------------------------------------------------|-----|
| S1.  | Experimental section .....                                                  | S2  |
| S2.  | Porous and non-porous structures for DBA-OC13.....                          | S3  |
| S3.  | Data analysis details .....                                                 | S4  |
| S4.  | Concentration dependence phase behaviour for DBA-OC13 on pristine HOPG..... | S6  |
| S5.  | Experimental details on corral fabrication .....                            | S9  |
| S.6  | Surface coverage of DBA-OC13 in corrals of different sizes .....            | S11 |
| S.7  | Concentration dependence phase behaviour for DBA-OC12 on pristine HOPG....  | S15 |
| S.8  | Surface coverage of DBA-OC12 in corrals of different sizes .....            | S16 |
| S.9  | Self-assembly of DBA-OC13 in circular and triangular corrals .....          | S18 |
| S.10 | Stability of nanoconfined DBA-OC13 over time .....                          | S19 |
| S.11 | Data for <i>in situ</i> nanoshaving at elevated temperature.....            | S20 |
| S.12 | Control experiment – Dependence on the nanoshaving direction .....          | S21 |
| S.13 | References .....                                                            | S23 |

## **S1. Experimental section**

### **S1.1 Synthesis of DBA**

The DBA derivatives used in this study were synthesized according to a previously reported method.<sup>1, 2</sup>

### **S1.2 STM investigation**

All STM experiments were conducted at ambient conditions (temperature: 20–23 °C; humidity: 40%–50%) using a PicoLE system operating in constant current mode. STM tips were mechanically cut from Pt/Ir (80% / 20%, diameter: 0.25 nm) wire. Stock solutions of achiral DBA derivatives were prepared in 1-phenyloctane (98%, Sigma Aldrich;  $6.7 \times 10^{-4}$  M), and further diluted to the desired concentration. Small amounts of DBA solutions (at varied concentrations) were deposited on a freshly cleaved or covalently modified highly oriented pyrolytic graphite (CM-HOPG) (grade ZYB, Advanced Ceramics Inc., Cleveland, OH, USA) substrate. The experiments were repeated in 2-3 sessions using different tips to check for reproducibility. STM data analysis was executed using either WSxM 5.0 or Scanning Probe Imaging Processor software (SPIP, Image Metrology ApS). Scanning parameters are indicated in figure captions and expressed as  $V_s$  for the sample bias and  $I_t$  for the tunneling current. The structural models for porous and non-porous structures corresponding to the high-resolution STM images were built using Materials Studio 7.0.

## S2. Porous and non-porous structures for DBA-OC13

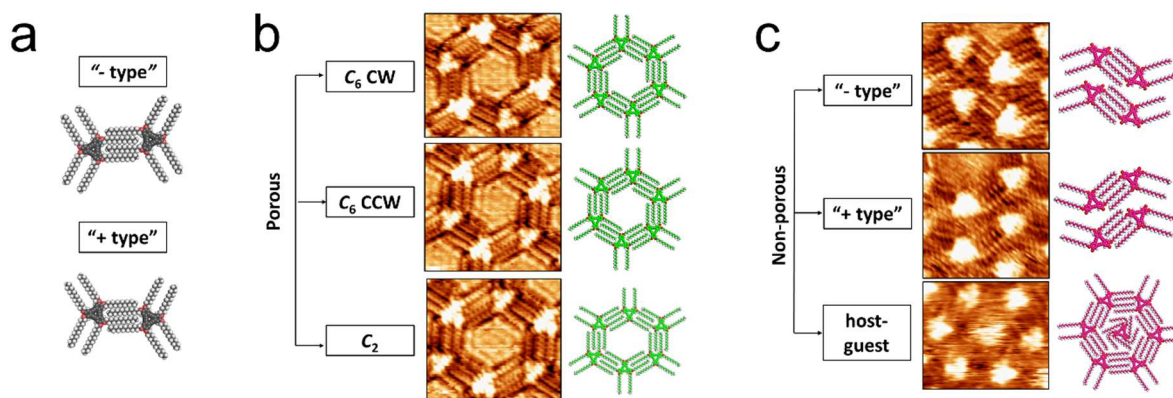

**Figure S1.** STM images and structural models of the most abundant porous and non-porous structures observed. (a) Dimer interdigitation patterns can be classified as “- type” or “+ type” depending on the relative position of the alkyl chains. (b) Exclusive “- type” or “+ type” dimer interdigitation gives rise to clockwise (CW) and counterclockwise (CCW) pores with  $C_6$ -symmetry, respectively. To a lesser extent, linear combinations of both dimer interdigitation patterns generate distorted hexagonal pores with lower symmetry ( $C_2$ ). (c) The non-porous phase is composed by linear domains exhibiting exclusively “- type” or “+ type” alkyl interdigitation patterns, and the occasional formation of auto host-guest complexes that display a similar molecular density to the linear pattern. Areas that appear fuzzy and/or ill-defined are classified as “defect” areas.

### S3. Data analysis details

Determination of the surface coverage of the porous and non-porous structures, and defects in the monolayer was performed while using SPIP<sup>TM</sup> software. The specific procedure followed depends on the layer morphology.

If the supramolecular pores are isolated, the surface coverage of the porous structure is calculated by first identifying all individual supramolecular pores (green dots in Figure S2). Then for each of these pores, the “pore” area is measured in the following way: in the SPIP software, the area of the hexagon formed by connecting the centers of the six DBA cores is measured. This procedure allows to determine the relative surface coverage of the porous structure, and avoids any systematic errors resulting from imaging artefacts. This procedure was followed for the analysis of the STM images of the self-assembly of DBA-OC13 at the 1-phenyloctane/graphite interface, for concentrations ranging between  $6.7 \times 10^{-4}$  M and  $5.6 \times 10^{-6}$  M (see Figure S2).

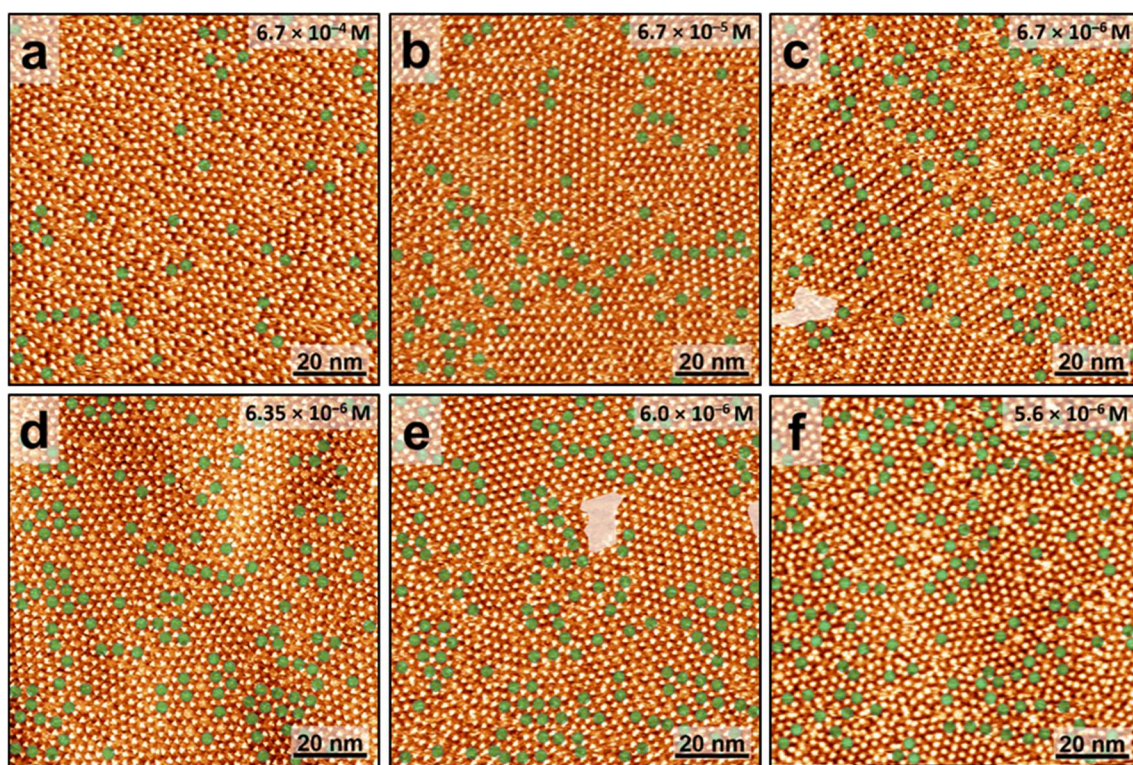

**Figure S2.** Large-scale STM images for the self-assembly of DBA-OC13 at different concentrations at the 1-phenyloctane/graphite interface. The non-porous structure is dominant on the surface. The hexagonal pores localized among the non-porous structure are indicated by green dots. Scanning parameters:  $V_s = -0.20$  V,  $I_t = 300$  pA.



At lower concentrations ( $6.7 \times 10^{-7} \text{ M} - 5.36 \times 10^{-6} \text{ M}$ ), the porous phase forms more extended domains. In this case both the porous and the non-porous phase can be easily tracked using the SPIP<sup>TM</sup> software area selection tools. The same protocol holds for the ill-defined areas classified as “defect” areas (white overlay) (see Figure S3).

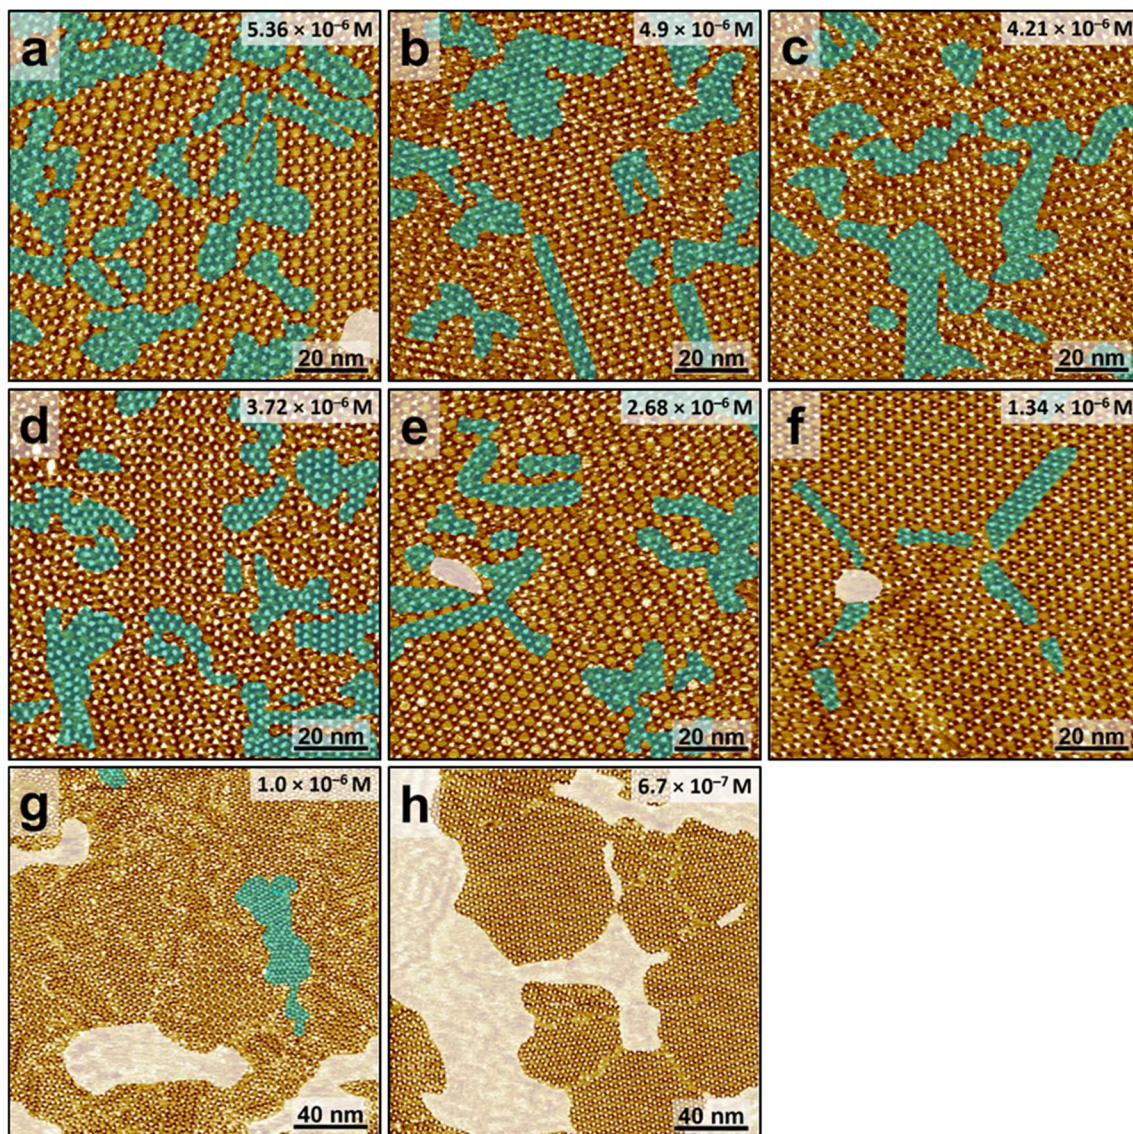

**Figure S3** Large-scale STM images of the self-assembly of DBA-OC13 at different concentrations at the 1-phenyloctane/graphite interface. The porous structure is dominant on the surface. The non-porous phase is delimited by the fainted blue areas while defects in the monolayer are covered in white. Scanning parameters:  $V_s = -0.20 \text{ V}$ ,  $I_t = 300 \text{ pA}$ .

#### S4. Concentration dependence phase behaviour for DBA-OC13 on pristine HOPG

For every concentration studied, typically 7 to 30 images obtained during 2-3 experimental sessions were used for the porous/non-porous surface coverage determination. Each point represents an average value, while the error bars represent the standard deviation.

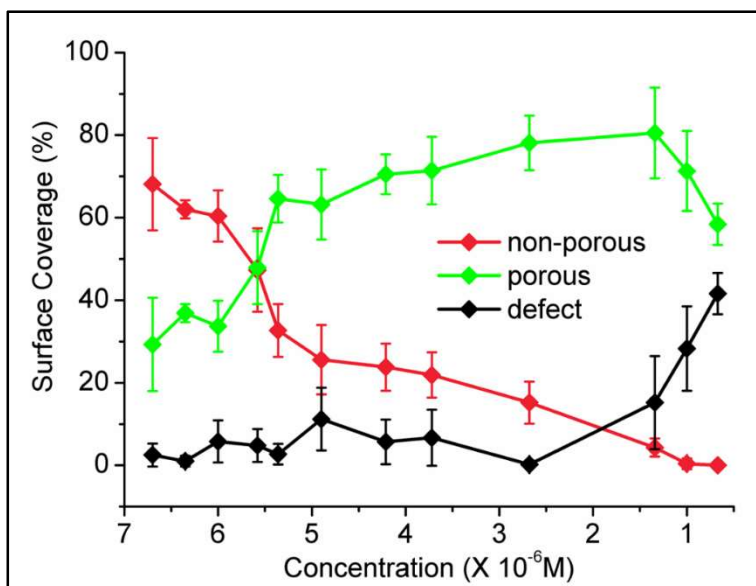

**Figure S4.** Concentration dependent surface coverage of porous (green) and non-porous (red) phase of DBA-OC13 at the 1-phenyloctane/pristine HOPG interface. At lower concentrations, defects in the monolayer (black) start to appear.

For each DBA-OC13 concentration studied, detailed information regarding the total scanning area analysed and the average surface coverage (%) for porous, non-porous and defects on the monolayer are available in the table below.

**Table S1.** Surface coverage for DBA-OC13 at the 1-phenyloctane/graphite interface, at different concentrations.

| Concentration<br>(M)  | Total<br>scanning<br>area<br>(nm <sup>2</sup> ) | Total<br>number<br>of<br>images | Area (nm <sup>2</sup> ) |        |        | Average surface coverage $\pm$ standard deviation (s. d.) (%) |       |               |       |        |       |
|-----------------------|-------------------------------------------------|---------------------------------|-------------------------|--------|--------|---------------------------------------------------------------|-------|---------------|-------|--------|-------|
|                       |                                                 |                                 | Non-<br>porous          | Porous | Defect | <b>Non-<br/>porous</b>                                        | s. d. | <b>Porous</b> | s. d. | Defect | s. d. |
| $6.7 \times 10^{-4}$  | 130000                                          | 13                              | 118794                  | 11206  | 0      | <b>91.6</b>                                                   | 1.0   | <b>8.4</b>    | 1.0   | 0      | 0     |
| $6.7 \times 10^{-5}$  | 80000                                           | 8                               | 70343                   | 8647   | 1010   | <b>87.5</b>                                                   | 1.5   | <b>11.2</b>   | 1.5   | 1.3    | 0.2   |
| $6.7 \times 10^{-6}$  | 70000                                           | 7                               | 47699                   | 20544  | 1757   | <b>68.1</b>                                                   | 11.2  | <b>29.3</b>   | 11.3  | 2.5    | 2.8   |
| $6.35 \times 10^{-6}$ | 170000                                          | 17                              | 105479                  | 62799  | 1722   | <b>62.0</b>                                                   | 2.2   | <b>36.9</b>   | 2.2   | 1.0    | 1.3   |
| $6.0 \times 10^{-6}$  | 200000                                          | 20                              | 120882                  | 67489  | 11629  | <b>60.4</b>                                                   | 6.2   | <b>33.7</b>   | 6.2   | 5.8    | 5.1   |
| $5.6 \times 10^{-6}$  | 290000                                          | 29                              | 137207                  | 139010 | 13783  | <b>47.3</b>                                                   | 10.1  | <b>47.9</b>   | 8.8   | 4.8    | 4.0   |
| $5.36 \times 10^{-4}$ | 300000                                          | 30                              | 98114                   | 193933 | 7953   | <b>32.7</b>                                                   | 6.4   | <b>64.6</b>   | 5.8   | 2.7    | 2.5   |
| $4.9 \times 10^{-5}$  | 140000                                          | 14                              | 35859                   | 88488  | 15653  | <b>25.6</b>                                                   | 8.4   | <b>63.2</b>   | 8.5   | 11.2   | 7.6   |
| $4.21 \times 10^{-6}$ | 120000                                          | 12                              | 28588                   | 84590  | 6822   | <b>23.8</b>                                                   | 5.7   | <b>70.5</b>   | 4.8   | 5.7    | 5.4   |
| $3.72 \times 10^{-6}$ | 210000                                          | 21                              | 45956                   | 150020 | 14024  | <b>21.9</b>                                                   | 5.5   | <b>71.4</b>   | 8.2   | 6.7    | 6.8   |
| $2.68 \times 10^{-6}$ | 200000                                          | 20                              | 30467                   | 156206 | 13327  | <b>15.2</b>                                                   | 5.1   | <b>78.1</b>   | 6.6   | 0.2    | 0.1   |
| $1.34 \times 10^{-6}$ | 140000                                          | 14                              | 5951                    | 112754 | 21295  | <b>4.3</b>                                                    | 2.2   | <b>80.5</b>   | 11.0  | 15.2   | 11.3  |
| $1.0 \times 10^{-6}$  | 360000                                          | 9                               | 1520                    | 256600 | 101880 | <b>0.4</b>                                                    | 1.3   | <b>71.3</b>   | 9.7   | 28.3   | 10.2  |
| $6.7 \times 10^{-7}$  | 340000                                          | 13                              | 0                       | 194987 | 145013 | <b>0</b>                                                      | 0     | <b>58.4</b>   | 5.0   | 41.6   | 5.0   |

In the table below (Table S2), there is an example which shows the determination of the surface coverage for each STM image obtained with a DBA-OC13 concentration of  $5.6 \times 10^{-6}$  M.

**Table S2.** Statistics for the surface coverage of porous and non-porous phase for DBA-OC13 ( $5.6 \times 10^{-6}$  M) at the 1-phenyloctane/graphite interface.

| Image          | Scanning area (nm <sup>2</sup> ) | No. of pores | Area for a single pore (nm <sup>2</sup> ) | Area (nm <sup>2</sup> ) |               |              | Surface coverage (%) |             |            |
|----------------|----------------------------------|--------------|-------------------------------------------|-------------------------|---------------|--------------|----------------------|-------------|------------|
|                |                                  |              |                                           | Non-porous              | Porous        | Defect       | Non-porous           | Porous      | Defect     |
| 1              | 10000                            | 200          | 22                                        | 5210                    | 4400          | 390          | 52.1                 | 44.0        | 3.9        |
| 2              | 10000                            | 220          | 23                                        | 4024                    | 5060          | 916          | 40.2                 | 50.6        | 9.2        |
| 3              | 10000                            | 237          | 24                                        | 3694                    | 5688          | 618          | 36.9                 | 56.9        | 6.2        |
| 4              | 10000                            | 196          | 24                                        | 4650                    | 4704          | 646          | 46.5                 | 47.0        | 6.5        |
| 5              | 10000                            | 128          | 22                                        | 7184                    | 2816          | 0            | 71.8                 | 28.2        | 0          |
| 6              | 10000                            | 150          | 25                                        | 6056                    | 3750          | 194          | 60.6                 | 37.5        | 1.9        |
| 7              | 10000                            | 194          | 22                                        | 4314                    | 4268          | 1418         | 43.1                 | 42.7        | 14.2       |
| 8              | 10000                            | 195          | 23                                        | 4911                    | 4485          | 604          | 49.1                 | 44.9        | 6.0        |
| 9              | 10000                            | 213          | 22                                        | 5080                    | 4686          | 234          | 50.8                 | 46.9        | 2.3        |
| 10             | 10000                            | 141          | 26                                        | 5402                    | 3666          | 932          | 54.0                 | 36.7        | 9.3        |
| 11             | 10000                            | 184          | 22                                        | 5504                    | 4048          | 448          | 55.0                 | 40.5        | 4.5        |
| 12             | 10000                            | 166          | 24                                        | 5505                    | 3984          | 511          | 55.1                 | 39.8        | 5.1        |
| 13             | 10000                            | 213          | 21                                        | 5527                    | 4473          | 0            | 55.3                 | 44.7        | 0          |
| 14             | 10000                            | 206          | 22                                        | 4801                    | 4532          | 667          | 48.0                 | 45.3        | 6.7        |
| 15             | 10000                            | 145          | 25                                        | 6242                    | 3625          | 133          | 62.4                 | 36.3        | 1.3        |
| 16             | 10000                            | 232          | 22                                        | 4763                    | 5104          | 133          | 47.6                 | 51.0        | 1.3        |
| 17             | 10000                            | 225          | 25                                        | 4080                    | 5625          | 293          | 40.8                 | 56.3        | 2.9        |
| 18             | 10000                            | 235          | 22                                        | 4686                    | 5170          | 144          | 46.9                 | 51.7        | 1.4        |
| 19             | 10000                            | 249          | 25                                        | 3317                    | 6225          | 458          | 33.2                 | 62.3        | 4.6        |
| 20             | 10000                            | 203          | 24                                        | 4889                    | 4872          | 239          | 48.9                 | 48.7        | 2.4        |
| 21             | 10000                            | 234          | 26                                        | 3530                    | 6084          | 386          | 35.3                 | 60.8        | 3.9        |
| 22             | 10000                            | 240          | 23                                        | 3415                    | 5520          | 1065         | 34.2                 | 55.2        | 10.7       |
| 23             | 10000                            | 237          | 22                                        | 3567                    | 5214          | 1219         | 35.7                 | 52.1        | 12.2       |
| 24             | 10000                            | 161          | 22                                        | 6458                    | 3542          | 0            | 64.6                 | 35.4        | 0          |
| 25             | 10000                            | 217          | 23                                        | 4870                    | 4991          | 139          | 48.7                 | 49.9        | 1.4        |
| 26             | 10000                            | 239          | 22                                        | 3501                    | 5258          | 1241         | 35.0                 | 52.6        | 12.4       |
| 27             | 10000                            | 277          | 24                                        | 3109                    | 6648          | 243          | 31.1                 | 66.5        | 2.4        |
| 28             | 10000                            | 215          | 24                                        | 4447                    | 5160          | 393          | 44.5                 | 51.6        | 3.9        |
| 29             | 10000                            | 246          | 22                                        | 4469                    | 5412          | 119          | 44.7                 | 54.1        | 1.2        |
| <b>Total</b>   | <b>290000</b>                    | <b>5998</b>  | –                                         | <b>137207</b>           | <b>139010</b> | <b>13783</b> | –                    | –           | –          |
| <b>Average</b> | –                                | <b>207</b>   | –                                         | –                       | –             | –            | <b>47.3</b>          | <b>47.9</b> | <b>4.8</b> |
| <b>s. d.</b>   | –                                | <b>37</b>    | –                                         | –                       | –             | –            | <b>10.1</b>          | <b>8.8</b>  | <b>4.0</b> |



## **S5. Experimental details on corral fabrication**

### **S5.1 Covalent modification of HOPG**

Electrochemical grafting of 3,4,5-trimethoxybenzenediazonium (3,4,5-TMD, concentration:  $\geq 2\text{mM}$ ) was performed using cyclic voltammetry in aqueous solutions, using an Autolab PGSTAT101 (Metrohm Autolab BV, The Netherlands). Before each experiment, the HOPG was freshly cleaved using scotch tape. The electrochemical modification procedure was carried out in a homemade single-compartment three-electrode cell with a working electrode area of  $50.3\text{ mm}^2$ , Pt wire counter and Ag/AgCl/3 M NaCl reference electrodes. 3,4,5-trimethoxybenzenediazonium (3,4,5-TMeOD) chloride is unstable and decomposes rapidly: hence it was synthesized from the corresponding aniline precursor immediately prior to electrochemical reduction. This procedure involves 5 mL of a 2 mM 3,4,5-trimethoxyaniline (97%, Sigma-Aldrich) in 50 mM HCl (Sigma-Aldrich) aqueous solution which was mixed with 100  $\mu\text{L}$  of aqueous  $\text{NaNO}_2$  (0.1 M) for activation of the diazotization reaction. Within 3 minutes this mixture was gently shaken and pipetted into the EC cell. Cyclic voltammetry (3 cycles, range: 0.5V to  $-0.6\text{V}$ , scanning rate:  $100\text{ mV/s}$ ) was used for the electrochemical activation. After modification, TBP modified samples were rinsed with Milli-Q water (Milli-Q, Millipore,  $18.2\text{ M}\Omega\text{ cm}$ ,  $\text{TOC} < 3\text{ ppb}$ ) to remove any physisorbed material from the surface and dried in a stream of Argon. All chemical compounds were used without further purification.

### **S5.2 Corral fabrication**

Before nanoshaving, densely and randomly packed 3,4,5-TMDs were grafted on the HOPG surface following the protocol described before. All corrals were created with a detailed control over the nanoshaving process using the Keysight PicoLITH 2.1 software package.<sup>3-5</sup> First, different shapes (square, circles and triangles) for the creation of nanocorrals were designed within this software. During the nanoshaving process, the STM was operating under high current (200 pA) and low sample bias ( $-1.0\text{ mV}$ ) conditions. These scanning parameters bring the tip in close proximity to the graphite substrate, such that the covalently bound aryls are removed from the HOPG surface. The tip speed for nanoshaving was set to  $400\text{ nm/s}$ .

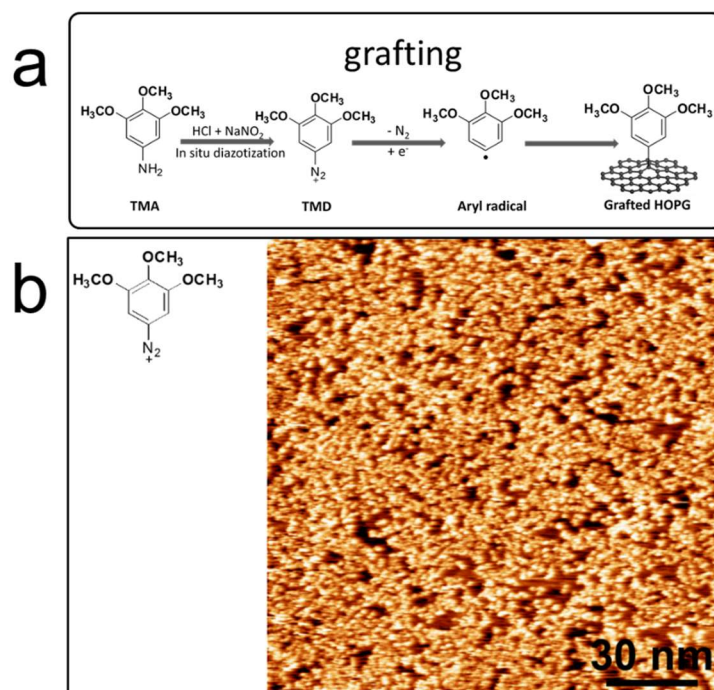

**Figure S5.** (a) Reaction scheme for the grafting of 3,4,5-TMeOD onto HOPG. (b) Large-scale STM image for the HOPG surface covalently modified by 3,4,5-trimethoxyphenyls. Scanning parameters:  $V_s = -0.80$  V,  $I_t = 80$  pA.

## S6. Surface coverage of DBA-OC13 in corrals of different sizes

The DBA-OC13 molecules adsorb in the corrals and form self-assembled monolayers, the area of which is defined by the size of the nanocorrals (Fig. 3a, b of the main text). For the larger nanocorrals, it is impossible to identify the self-assembly structures without zooming in (at  $50 \times 50 \text{ nm}^2$ ). Repeating this nanoshaving process many times on different locations for each of the nanocorral sizes, rendered average values for the surface coverage of the porous phase.

### S6.1 Data for smaller corrals

**Table S3.** Detailed statistics of the porous surface coverage of DBA-OC13 ( $5.6 \times 10^{-6} \text{ M}$ ) in smaller corrals, where confinement effects are more pronounced.

| Image | Square corrals (24 nm)         |              |                                                    |                                           | Square corrals (39 nm)         |             |                                              |                                           | Square corrals (60 nm)         |             |                                              |                                           |
|-------|--------------------------------|--------------|----------------------------------------------------|-------------------------------------------|--------------------------------|-------------|----------------------------------------------|-------------------------------------------|--------------------------------|-------------|----------------------------------------------|-------------------------------------------|
|       | Corral area (nm <sup>2</sup> ) | No. of pores | Total area for porous structure (nm <sup>2</sup> ) | Surface coverage for porous structure (%) | Corral area (nm <sup>2</sup> ) | No. of pore | Area for porous structure (nm <sup>2</sup> ) | Surface coverage for porous structure (%) | Corral area (nm <sup>2</sup> ) | No. of pore | Area for porous structure (nm <sup>2</sup> ) | Surface coverage for porous structure (%) |
| 1     | 474                            | 3            | 54                                                 | 11.4                                      | 1295                           | 8           | 144                                          | 11.1                                      | 3289                           | 21          | 441                                          | 13.4                                      |
| 2     | 476                            | 2            | 36                                                 | 7.6                                       | 1289                           | 7           | 126                                          | 9.8                                       | 3039                           | 14          | 294                                          | 9.7                                       |
| 3     | 486                            | 3            | 54                                                 | 11.1                                      | 1376                           | 8           | 144                                          | 10.5                                      | 3230                           | 26          | 546                                          | 16.9                                      |
| 4     | 539                            | 3            | 54                                                 | 10.0                                      | 1632                           | 11          | 198                                          | 12.1                                      | 3347                           | 17          | 357                                          | 10.7                                      |
| 5     | 727                            | 2            | 36                                                 | 5.0                                       | 1756                           | 7           | 126                                          | 7.2                                       | 3807                           | 23          | 483                                          | 12.7                                      |
| 6     | 758                            | 2            | 36                                                 | 4.7                                       | 1752                           | 8           | 144                                          | 8.2                                       | 4255                           | 15          | 315                                          | 7.4                                       |
| 7     | 614                            | 2            | 36                                                 | 5.9                                       | 1637                           | 4           | 72                                           | 4.4                                       | 3676                           | 26          | 546                                          | 14.9                                      |
| 8     | 588                            | 2            | 36                                                 | 6.1                                       | 1591                           | 4           | 72                                           | 4.5                                       | 3605                           | 16          | 336                                          | 9.3                                       |
| 9     | 719                            | 2            | 36                                                 | 5.0                                       | 1655                           | 10          | 180                                          | 10.9                                      | 4489                           | 22          | 462                                          | 10.3                                      |
| 10    | 560                            | 3            | 54                                                 | 9.6                                       | 1516                           | 12          | 216                                          | 14.2                                      | 4541                           | 17          | 357                                          | 7.9                                       |
| 11    | 585                            | 1            | 18                                                 | 3.1                                       | 1087                           | 7           | 126                                          | 11.6                                      | 2607                           | 19          | 399                                          | 15.3                                      |
| 12    | 625                            | 1            | 18                                                 | 2.9                                       | 1711                           | 13          | 234                                          | 13.7                                      | 3906                           | 17          | 357                                          | 9.0                                       |
| 13    | 587                            | 4            | 72                                                 | 12.3                                      | 1516                           | 8           | 144                                          | 9.5                                       | 3491                           | 13          | 273                                          | 7.8                                       |
| 14    | 588                            | 2            | 36                                                 | 6.1                                       | 1375                           | 10          | 180                                          | 13.1                                      | 3409                           | 5           | 105                                          | 3.1                                       |
| 15    | 662                            | 2            | 36                                                 | 5.4                                       | 1600                           | 7           | 126                                          | 7.9                                       | 3530                           | 20          | 420                                          | 11.9                                      |

## S6.2 Data for larger corrals

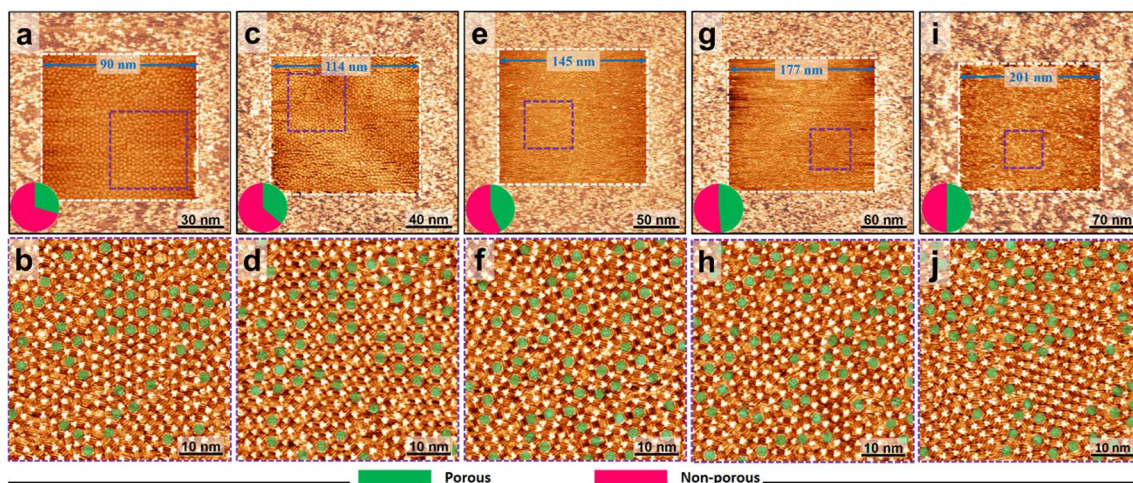

**Figure S6.** Large-scale (top row) and zoomed-in STM (bottom row) images showing the self-assemblies of DBA-OC13 ( $5.6 \times 10^{-6}$  M) in square corrals of different size. (a, c, e, g and i) The size is indicated in the corrals. Scanning parameters:  $V_s = -0.80$  V,  $I_t = 80$  pA. (b, d, f, h and j) Zoomed-in images of the self-assembly of DBA-OC13 in the nanocorrals above. Scan size is  $50 \times 50$  nm<sup>2</sup>. Porous structures are indicated by green dots. Scanning parameters:  $V_s = -0.20$  V,  $I_t = 300$  pA. The pie charts reveal the relative surface coverage of the porous (green) and non-porous (red) phases, based on the average of 40 images, obtained from 10 nanocorrals.

**Table S4.** Average surface coverage (%) for the porous/non-porous phase of DBA-OC13 ( $5.6 \times 10^{-6}$  M) in square corrals of different sizes.

| Corral size (nm)            |   | Average No. of pores in corrals | Average No. of pores in zoomed areas (50 × 50 nm <sup>2</sup> ) | Average area for porous structure (nm <sup>2</sup> ) | Average surface coverage ± s. d. (%) |       |        |       |
|-----------------------------|---|---------------------------------|-----------------------------------------------------------------|------------------------------------------------------|--------------------------------------|-------|--------|-------|
| Average side length ± s. d. |   |                                 |                                                                 |                                                      | Non-porous                           | s. d. | Porous | s. d. |
| 24                          | 2 | 2.3                             | —                                                               | 43                                                   | 92.9                                 | 3.1   | 7.1    | 3.1   |
| 39                          | 3 | 8.3                             | —                                                               | 150                                                  | 90.1                                 | 3.0   | 9.9    | 3.0   |
| 60                          | 4 | 18.1                            | —                                                               | 387                                                  | 89.3                                 | 3.6   | 10.7   | 3.6   |
| 90                          | 6 | —                               | 36.7                                                            | 697                                                  | 72.1                                 | 7.4   | 27.9   | 7.4   |
| 114                         | 4 | —                               | 52.0                                                            | 972                                                  | 61.1                                 | 8.0   | 38.9   | 8.0   |
| 145                         | 3 | —                               | 59.8                                                            | 1156                                                 | 53.7                                 | 4.6   | 46.3   | 4.6   |
| 177                         | 6 | —                               | 62.4                                                            | 1226                                                 | 50.9                                 | 4.3   | 49.1   | 4.3   |
| 201                         | 4 | —                               | 63.3                                                            | 1252                                                 | 49.9                                 | 5.2   | 50.1   | 5.2   |

For every corral size, we use in total forty  $50 \times 50 \text{ nm}^2$  images for calculating the surface coverage of the porous/non-porous phase. Table S5 shows detailed information on the statistics obtained for  $114 \times 114 \text{ nm}^2$  corral, as an example.

**Table S5.** Detailed statistics for the porous/non-porous surface coverage of DBA-OC13 ( $5.6 \times 10^{-6} \text{ M}$ ) in corrals of  $114 \times 114 \text{ nm}^2$ .

| Image | Corral | Zoom area ( $\text{nm}^2$ ) | No. of pores | Area for 1 pore | Area ( $\text{nm}^2$ ) |        | Surface coverage (%) |             |
|-------|--------|-----------------------------|--------------|-----------------|------------------------|--------|----------------------|-------------|
|       |        |                             |              |                 | Non-porous             | Porous | Non-porous           | Porous      |
| 1     | 1      | 2500                        | 57           | 19              | 1417                   | 1083   | <b>56.7</b>          | <b>43.3</b> |
| 2     |        | 2500                        | 40           | 19              | 1740                   | 760    | <b>69.6</b>          | <b>30.4</b> |
| 3     |        | 2500                        | 39           | 19              | 1759                   | 741    | <b>70.4</b>          | <b>29.6</b> |
| 4     | 2      | 2500                        | 40           | 20              | 1700                   | 800    | <b>68.0</b>          | <b>32.0</b> |
| 5     |        | 2500                        | 41           | 20              | 1680                   | 820    | <b>67.2</b>          | <b>32.8</b> |
| 6     |        | 2500                        | 41           | 19              | 1721                   | 779    | <b>68.8</b>          | <b>31.2</b> |
| 7     |        | 2500                        | 34           | 19              | 1854                   | 646    | <b>74.2</b>          | <b>25.8</b> |
| 8     | 3      | 2500                        | 54           | 17              | 1582                   | 918    | <b>63.3</b>          | <b>36.7</b> |
| 9     |        | 2500                        | 46           | 17              | 1718                   | 782    | <b>68.7</b>          | <b>31.3</b> |
| 10    |        | 2500                        | 58           | 18              | 1456                   | 1044   | <b>58.2</b>          | <b>41.8</b> |
| 11    | 4      | 2500                        | 52           | 18              | 1564                   | 936    | <b>62.6</b>          | <b>37.4</b> |
| 12    |        | 2500                        | 57           | 19              | 1417                   | 1083   | <b>56.7</b>          | <b>43.3</b> |
| 13    | 5      | 2500                        | 52           | 17              | 1616                   | 884    | <b>64.6</b>          | <b>35.4</b> |
| 14    |        | 2500                        | 55           | 17              | 1565                   | 935    | <b>62.6</b>          | <b>37.4</b> |
| 15    |        | 2500                        | 36           | 17              | 1888                   | 612    | <b>75.5</b>          | <b>24.5</b> |
| 16    |        | 2500                        | 42           | 18              | 1744                   | 756    | <b>69.8</b>          | <b>30.2</b> |
| 17    | 6      | 2500                        | 62           | 20              | 1260                   | 1240   | <b>50.4</b>          | <b>49.6</b> |
| 18    |        | 2500                        | 60           | 19              | 1360                   | 1140   | <b>54.4</b>          | <b>45.6</b> |
| 19    |        | 2500                        | 56           | 20              | 1380                   | 1120   | <b>55.2</b>          | <b>44.8</b> |
| 20    |        | 2500                        | 38           | 20              | 1740                   | 760    | <b>69.6</b>          | <b>30.4</b> |
| 21    | 7      | 2500                        | 69           | 20              | 1120                   | 1380   | <b>44.8</b>          | <b>55.2</b> |
| 22    |        | 2500                        | 75           | 20              | 1000                   | 1500   | <b>40.0</b>          | <b>60.0</b> |
| 23    |        | 2500                        | 67           | 19              | 1227                   | 1273   | <b>49.1</b>          | <b>50.9</b> |
| 24    |        | 2500                        | 58           | 19              | 1398                   | 1102   | <b>55.9</b>          | <b>44.1</b> |
| 25    | 8      | 2500                        | 36           | 18              | 1852                   | 648    | <b>74.1</b>          | <b>25.9</b> |
| 26    | 9      | 2500                        | 53           | 18              | 1546                   | 954    | <b>61.8</b>          | <b>38.2</b> |
| 27    |        | 2500                        | 53           | 18              | 1546                   | 954    | <b>61.8</b>          | <b>38.2</b> |
| 28    |        | 2500                        | 60           | 18              | 1420                   | 1080   | <b>56.8</b>          | <b>43.2</b> |
| 29    |        | 2500                        | 45           | 17              | 1735                   | 765    | <b>69.4</b>          | <b>30.6</b> |
| 30    | 10     | 2500                        | 57           | 18              | 1474                   | 1026   | <b>59.0</b>          | <b>41.0</b> |



|    |    |      |    |    |      |      |      |      |
|----|----|------|----|----|------|------|------|------|
| 31 |    | 2500 | 56 | 17 | 1548 | 952  | 61.9 | 38.1 |
| 32 |    | 2500 | 54 | 17 | 1582 | 918  | 63.3 | 36.7 |
| 33 |    | 2500 | 57 | 19 | 1417 | 1083 | 56.7 | 43.3 |
| 34 | 11 | 2500 | 57 | 19 | 1417 | 1083 | 56.7 | 43.3 |
| 35 |    | 2500 | 53 | 19 | 1493 | 1007 | 59.7 | 40.3 |
| 36 |    | 2500 | 49 | 20 | 1520 | 980  | 60.8 | 39.2 |
| 37 | 12 | 2500 | 50 | 20 | 1500 | 1000 | 60.0 | 40.0 |
| 38 |    | 2500 | 52 | 20 | 1460 | 1040 | 58.4 | 41.6 |
| 39 |    | 2500 | 62 | 20 | 1260 | 1240 | 50.4 | 49.6 |
| 40 |    | 2500 | 55 | 19 | 1455 | 1045 | 58.2 | 41.8 |

### S6.3 Data for different concentrations

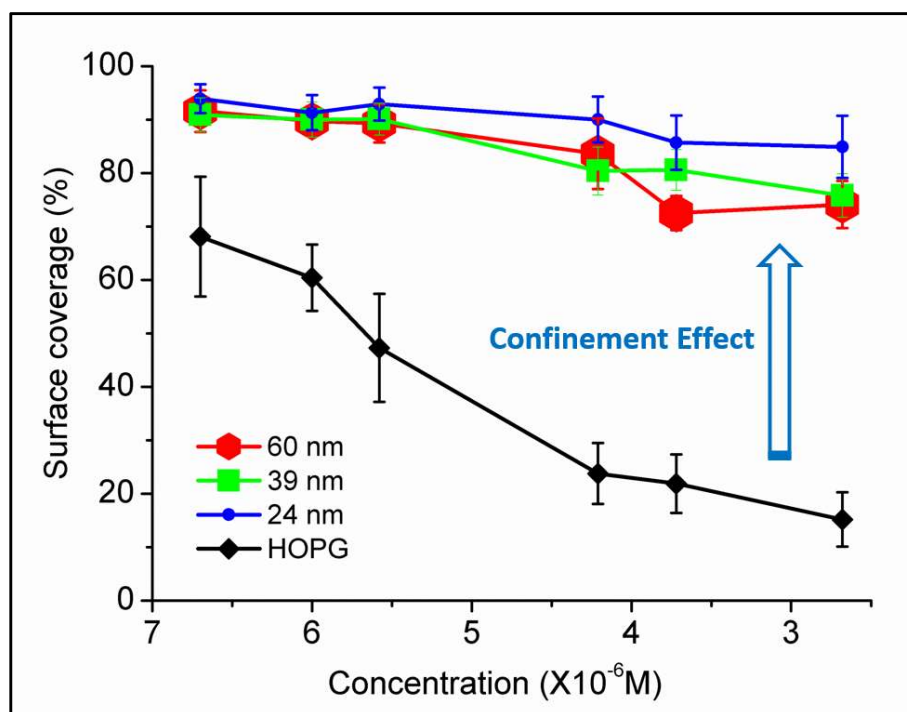

**Figure S7.** Dependence of surface coverage of the non-porous structure of DBA-OC13 on concentration in 1-phenyloctane, as experimentally addressed for bare HOPG (black), and in square corrals with average size of 24 (blue), 39 (green), and 60 nm (red). Each data point is the average of 15 images from different positions.

### S7. Concentration dependence phase behaviour for DBA-OC12 on pristine HOPG

For every concentration studied, 15 to 30 images obtained during 2-3 experimental sessions were used for the porous/non-porous surface coverage determination. Each point represents an average value, while the error bars represent the standard deviation.

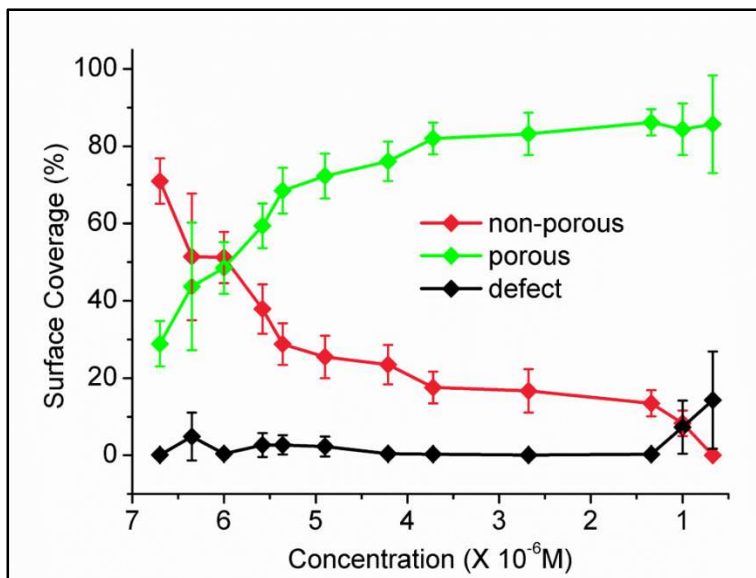

**Figure S8.** Concentration dependent surface coverage of porous (green) and non-porous (red) phase of DBA-OC12 at the 1-phenyloctane/pristine HOPG interface.

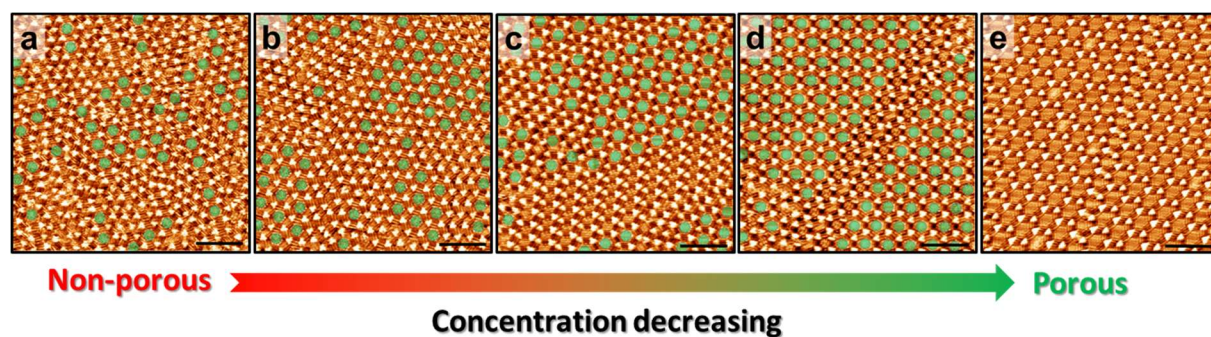

**Figure S9.** Representative large-scale STM images for DBA-OC12 showing the phase transition from non-porous to porous phase. Concentration: (a)  $6.7 \times 10^{-4}$  M; (b)  $6.7 \times 10^{-6}$  M; (c)  $6.0 \times 10^{-6}$  M; (d)  $2.68 \times 10^{-6}$  M; (e)  $6.7 \times 10^{-7}$  M. Scanning parameters:  $V_s = -0.20$  V,  $I_t = 300$  pA. Scale bar is 10 nm.

### S8. Surface coverage of DBA-OC12 in corrals of different sizes

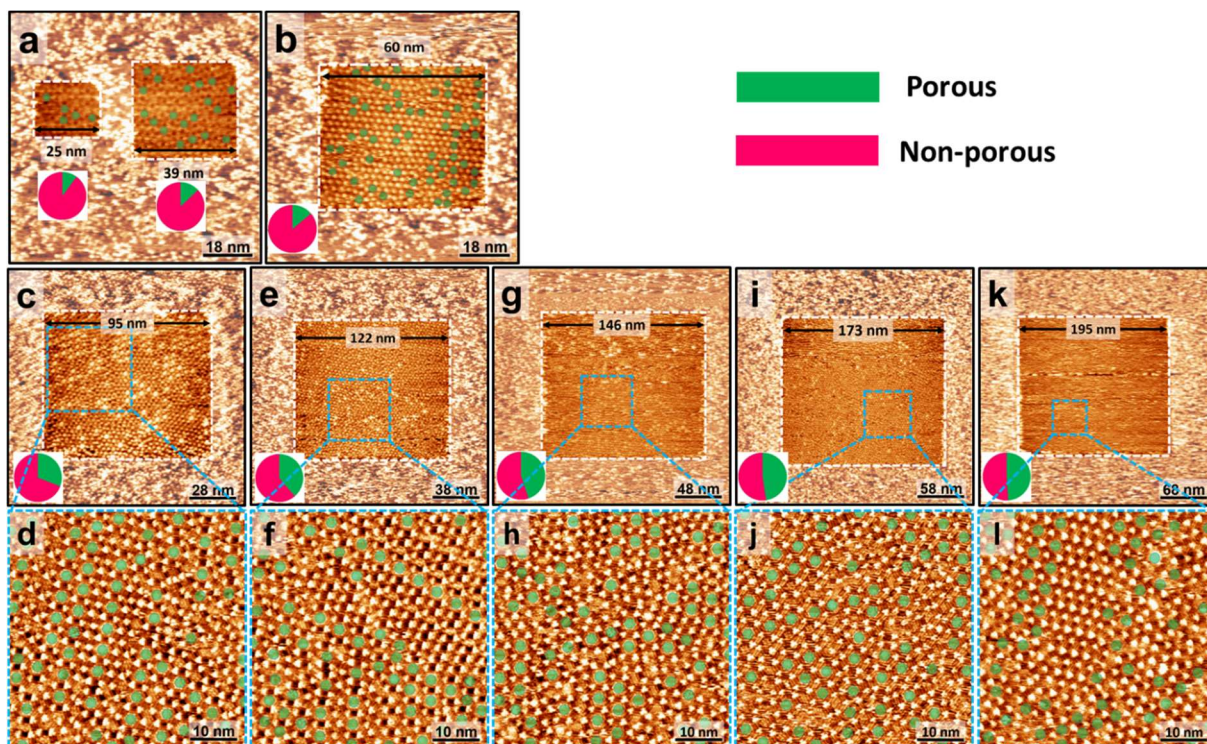

**Figure S10.** Large-scale and zoomed STM images showing the self-assemblies of DBA-OC12 ( $6.0 \times 10^{-6}$  M) in corrals with different sizes. Porous structures are indicated by green dots. The pie charts reveal the relative surface coverage of the porous (green) and non-porous (red) phases. Scanning parameters: (a, b, c, e, g, i and k)  $V_s = -0.80$  V,  $I_t = 80$  pA; (d, f, h, j and l)  $V_s = -0.20$  V,  $I_t = 300$  pA.

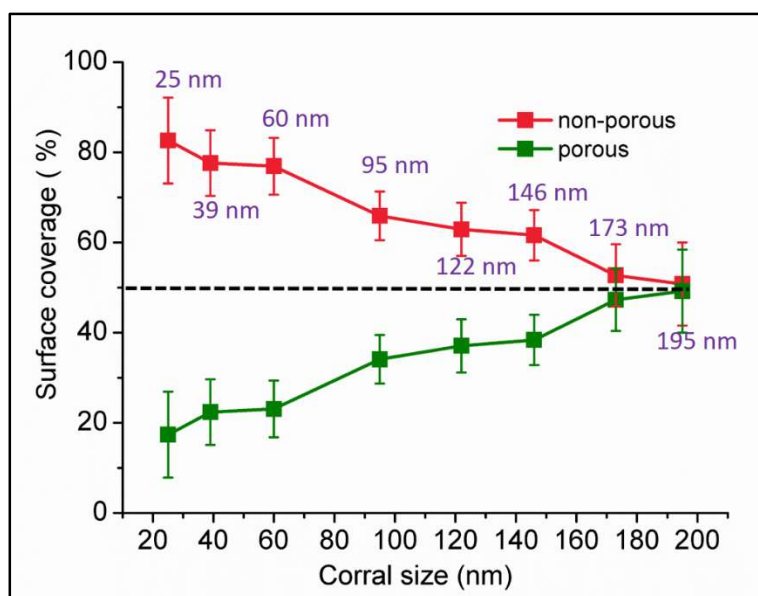

**Figure S11.** Dependence of the surface coverage of porous and non-porous structures of DBA-OC12 ( $6.0 \times 10^{-6}$  M) as a function of the size of the square corrals. For every corral size, forty  $50 \times 50 \text{ nm}^2$  images were used for porous/non-porous surface coverage determination.

**Table S6.** Average surface coverage (%) for the porous/non-porous phase of DBA-OC12 ( $6.0 \times 10^{-6}$  M) in square corrals of different sizes

| Corral size (nm)            |   | Average No. of pores in corrals | Average No. of pores in zoomed areas (50 × 50 nm <sup>2</sup> ) | Average area for porous structure (nm <sup>2</sup> ) | Average surface coverage ± s. d. (%) |       |        |       |
|-----------------------------|---|---------------------------------|-----------------------------------------------------------------|------------------------------------------------------|--------------------------------------|-------|--------|-------|
| Average side length ± s. d. |   |                                 |                                                                 |                                                      | Non-porous                           | s. d. | Porous | s. d. |
| 25                          | 1 | 5.6                             | –                                                               | 104                                                  | 82.6                                 | 9.5   | 17.4   | 9.5   |
| 39                          | 1 | 18.9                            | –                                                               | 342                                                  | 77.6                                 | 7.3   | 22.4   | 7.3   |
| 60                          | 2 | 45.1                            | –                                                               | 818                                                  | 76.9                                 | 6.3   | 23.1   | 6.3   |
| 95                          | 4 | –                               | 46.1                                                            | 852                                                  | 65.9                                 | 5.4   | 34.1   | 5.4   |
| 122                         | 4 | –                               | 50.3                                                            | 929                                                  | 62.9                                 | 5.9   | 37.1   | 5.9   |
| 146                         | 5 | –                               | 51.4                                                            | 960                                                  | 61.6                                 | 5.6   | 38.4   | 5.6   |
| 173                         | 5 | –                               | 61.5                                                            | 1183                                                 | 52.7                                 | 6.9   | 47.3   | 6.9   |
| 195                         | 5 | –                               | 63.1                                                            | 1229                                                 | 50.8                                 | 9.2   | 49.2   | 9.2   |



### S9. Self-assembly of DBA-OC13 in circular and triangular corrals

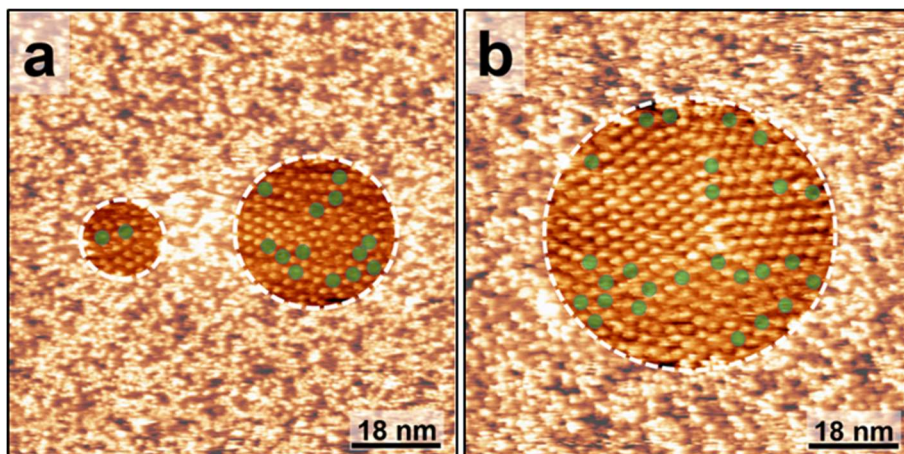

**Figure S12.** (a, b) STM images for the self-assembly of DBA-OC13 ( $5.6 \times 10^{-6}$  M) in circular nanocorrals of different size. The diameter of these nanocorrals is  $22 \pm 2$  nm and  $40 \pm 1$  nm in (a), and  $61 \pm 5$  nm in (b). Porous structures are indicated by green dots. Scanning parameters:  $V_s = -0.80$  V,  $I_t = 80$  pA.

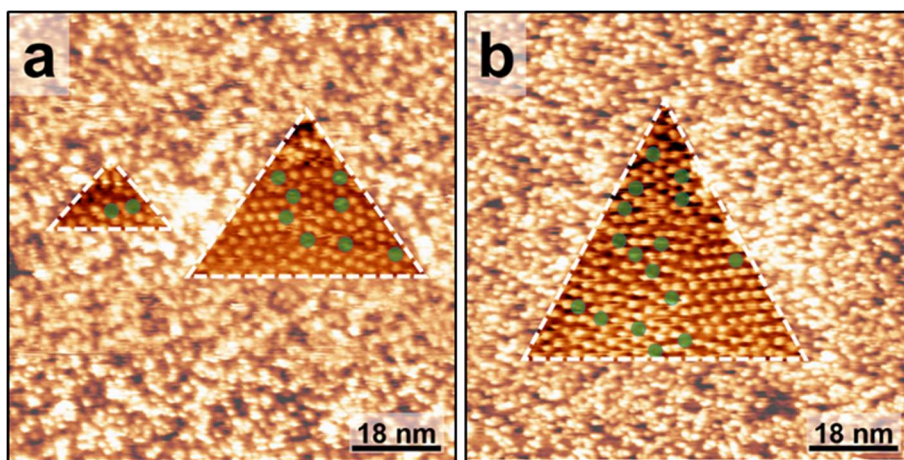

**Figure S13.** (a, b) STM images for the self-assembly of DBA-OC13 ( $5.6 \times 10^{-6}$  M) in triangular corrals of different size. The side of these nanocorrals measures  $31 \pm 6$  nm and  $48 \pm 7$  nm in (a) and  $69 \pm 4$  nm in (b). Porous structures are indicated by green dots. Scanning parameters:  $V_s = -0.80$  V,  $I_t = 80$  pA.

**Conclusion:** irrespective of the nanocorral shape, the non-porous phase is favored in the corrals.



### S10. Stability of nanoconfined DBA-OC13 assemblies over time

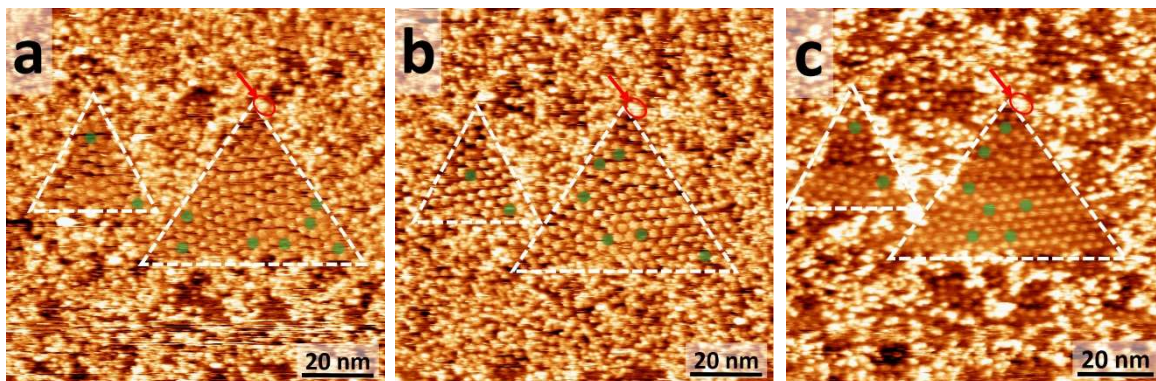

**Figure S14.** STM-images of DBA-OC13 ( $2.68 \times 10^{-6}$  M) at the 1-phenyloctane/HOPG interface. The time-interval between image a and b is 15 minutes, and between b and c is 11 minutes. The images were obtained under continuous scanning. The green dots indicate the porous phase. The red arrow points at a distinguishable surface feature for reference. Scanning parameters:  $V_s = -0.80$  V,  $I_t = 80$  pA.

**Conclusion:** While dynamics were occasionally observed, the porous : non-porous ratio remained unaltered.

### S11. Data for *in situ* nanoshaving at elevated temperature

*In situ* nanoshaving in the presence of DBA-OC13 ( $5.6 \times 10^{-6}$  M in 1-phenyloctane) was performed at both room temperature and at 50 °C. In order to contain the solution over longer periods of time, a liquid cell was mounted on top of the sample. 2 to 3 droplets of solution were added to the liquid cell at room temperature prior to nanoshaving/imaging. First, nanocorrals were created at room temperature. Next, the sample was heated to 50 °C using a LakeShore 331 Temperature Controller and left at this temperature for ~10 minutes in order to stabilize. Nanocorrals were subsequently made and imaged at 50 °C. The results are given in Table S7.

**Table S7.** Surface composition of self-assembled phases formed by DBA-OC13 ( $5.6 \times 10^{-6}$  M in 1-phenyloctane) inside *in situ* created square nanocorrals at room temperature and at 50 °C. 8 corrals (23.9 nm) and 8 corrals (36.1 nm) were investigated at room temperature; 13 corrals (23.9 nm) and 14 corrals (36.1 nm) were investigated at 50°C. At least two samples were investigated for each reported value. Errors represent the standard deviation.

| Corral width (nm) | Phase  | Surface composition (%) |             |
|-------------------|--------|-------------------------|-------------|
|                   |        | T <sub>room</sub>       | 50 °C       |
| 23.9 ± 2.9        | Porous | 23.3 ± 4.0              | 15.3 ± 13.6 |
|                   | Linear | 76.7 ± 4.0              | 84.7 ± 13.6 |
|                   | Defect | 0                       | 0           |
| 36.1 ± 3.0        | Porous | 18.7 ± 6.3              | 14.9 ± 11.9 |
|                   | Linear | 81.3 ± 6.3              | 84.6 ± 12.4 |
|                   | Defect | 0                       | 0.5 ± 1.7   |

**Conclusion:** The nanoconfined surface composition of DBA-OC13 at 50 °C is not significantly different from that at room temperature.

## S12. Control experiment – Dependence on the nanoshaving direction

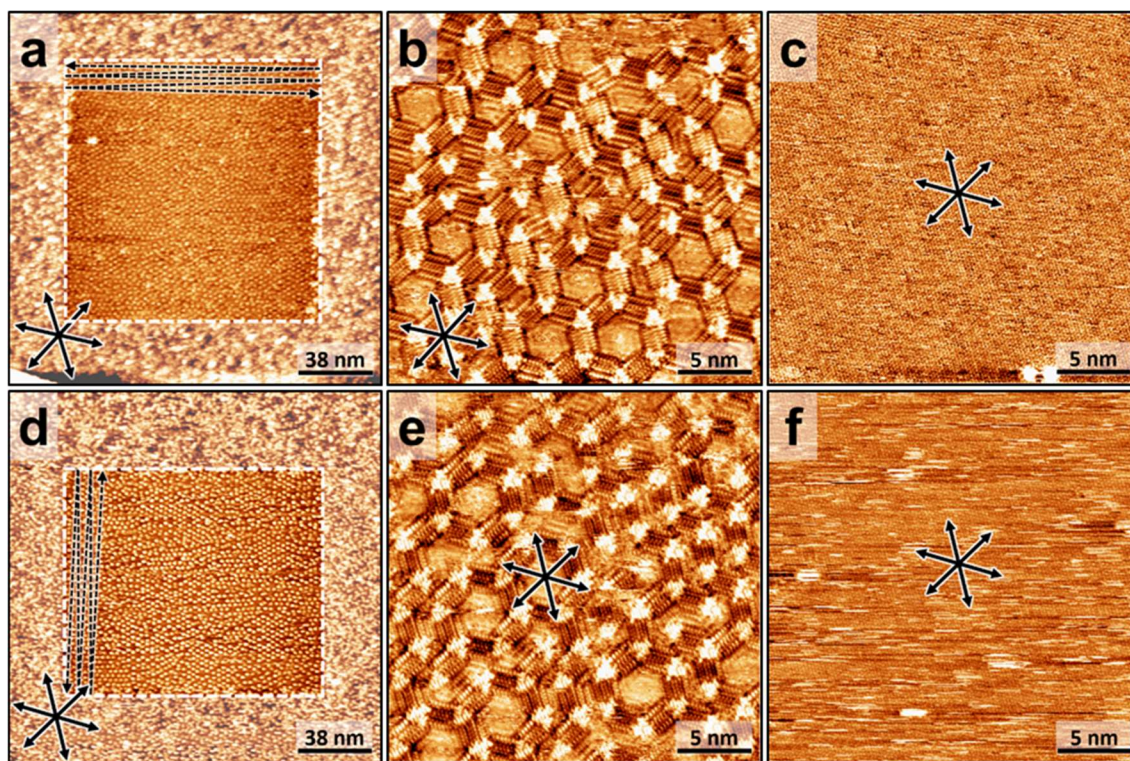

**Figure S15.** Self-assembly of DBA-OC13 ( $5.6 \times 10^{-6}$  M) in square corrals, under different nanoshaving directions (represented by the dotted arrows in (a) and (d)). The main symmetry axis of HOPG are defined by the black arrows. Panels (b) and (e) show zoomed-in images obtained inside corrals (a) and (b). Panel (c) and (f) show the HOPG lattice obtained in the same location as the previous images. Scanning parameters:  $V_s = -0.80$  V,  $I_t = 80$  pA for panel (a) and (d);  $V_s = -0.20$  V,  $I_t = 300$  pA for panel (b) and (e);  $V_s = -0.20$  V,  $I_t = 1$  pA for panel (c) and (f).

**Conclusion:** The packing of DBA molecules is determined by the orientation of the HOPG lattice, namely, the alkyl chains are extended along one of the symmetry axes of the HOPG lattice.



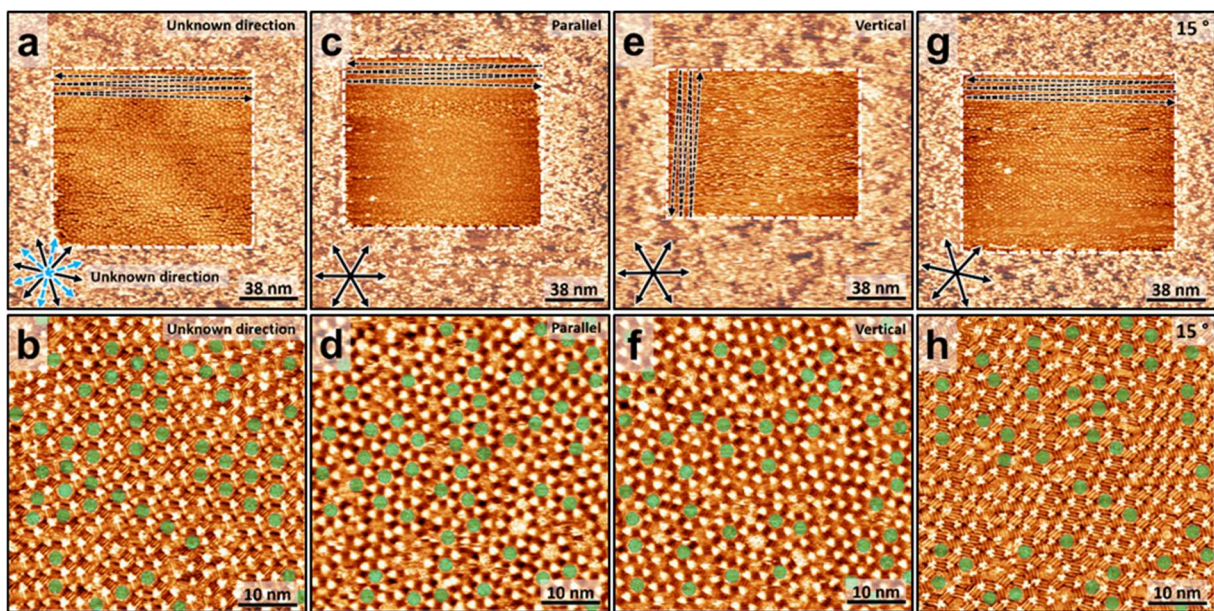

**Figure S16.** Large-scale and zoomed-in STM images showing the self-assembly of DBA-OC13 ( $5.6 \times 10^{-6}$  M) in corrals where the direction of the nanoshaving process was controlled with respect to one of the main symmetry axes of HOPG. (a, b) unknown direction; (c, d) parallel direction ( $0^\circ$ ); (e, f) vertical direction ( $90^\circ$ ); (g and h)  $15^\circ$  to one of the main symmetry axis of HOPG. Scanning parameters: (a, c, e, g)  $V_s = -0.80$  V,  $I_t = 80$  pA; (b, d, f, h)  $V_s = -0.20$  V,  $I_t = 300$  pA.

**Table S8.** Summary of the surface coverage for porous and non-porous structures in corrals created under different nanoshaving directions with respect to the HOPG lattice.

| Nanoshaving direction   | Non-porous       | Porous           | Number of images |
|-------------------------|------------------|------------------|------------------|
| Unknown                 | $61.1 \pm 8.0$ % | $38.9 \pm 8.0$ % | 40               |
| Parallel ( $0^\circ$ )  | $60.2 \pm 4.5$ % | $39.8 \pm 4.5$ % | 18               |
| Vertical ( $90^\circ$ ) | $59.6 \pm 5.2$ % | $40.4 \pm 5.2$ % | 17               |
| $15^\circ$              | $60.4 \pm 4.3$ % | $39.6 \pm 4.3$ % | 30               |

**Conclusion:** The relative surface coverage for the porous and non-porous phases is not influenced by the nanoshaving direction.

### S13. References

1. K. Tahara, S. Furukawa, H. Uji-i, T. Uchino, T. Ichikawa, J. Zhang, W. Mamdouh, M. Sonoda, F. C. De Schryver, S. De Feyter and Y. Tobe, *Journal of the American Chemical Society*, 2006, **128**, 16613-16625.
2. K. Tahara, C. A. Johnson, T. Fujita, M. Sonoda, F. C. De Schryver, S. De Feyter, M. M. Haley and Y. Tobe, *Langmuir : the ACS journal of surfaces and colloids*, 2007, **23**, 10190-10197.
3. L. Verstraete, J. Greenwood, B. E. Hirsch and S. De Feyter, *ACS Nano*, 2016, **10**, 10706-10715.
4. L. Verstraete, B. E. Hirsch, J. Greenwood and S. De Feyter, *Chemical communications*, 2017, **53**, 4207-4210.
5. J. Greenwood, T. H. Phan, Y. Fujita, Z. Li, O. Ivasenko, W. Vanderlinden, H. Van Gorp, W. Frederickx, G. Lu, K. Tahara, Y. Tobe, H. Uji-i, S. F. L. Mertens and S. De Feyter, *ACS Nano*, 2015, **9**, 5520-5535.
